# Supplementary material for: Temperature-tuned ferromagnetism in hydrogenated multilayer graphene
Source: Royal Society of Chemistry journal article supplement (doi:10.1039/c8ra02648c), 2018-01-01
Supplement: c8ra02648c1.pdf [file c8ra02648c1.pdf]

## Supporting information

### Temperature-tuned ferromagnetism in hydrogenated multilayer graphene

Man Zhao,<sup>a,b</sup> He Xiao,<sup>\*, a,b</sup> Shuai Chen,<sup>c</sup> Tianjun Hu,<sup>a,b</sup> Jianfeng Jia<sup>\*, a,b</sup> and Haishun Wu<sup>a,b</sup>

<sup>a</sup>.*Key Laboratory of Magnetic Molecules & Magnetic Information Materials Ministry of Education, Shanxi Normal University. Linfen, China, 041004.*

<sup>b</sup>.*The School of Chemical and Material Science, Shanxi Normal University, No. 1, Gongyuan Street, Linfen, China, 041004*

<sup>c</sup>.*State Key Laboratory of Coal Conversion, Institute of Coal Chemistry, Chinese Academy of Sciences, Taiyuan, China, 030001.*

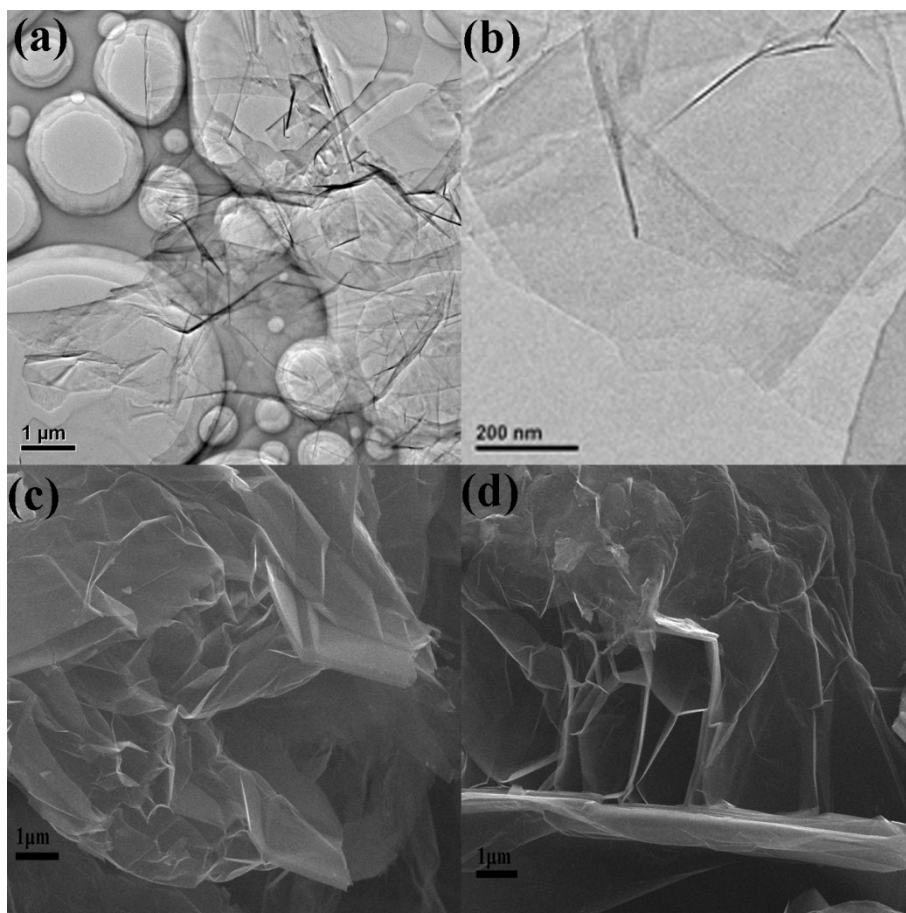

Fig. S1. (a, b) TEM images of HG300. (c, d) SEM images of HG300.

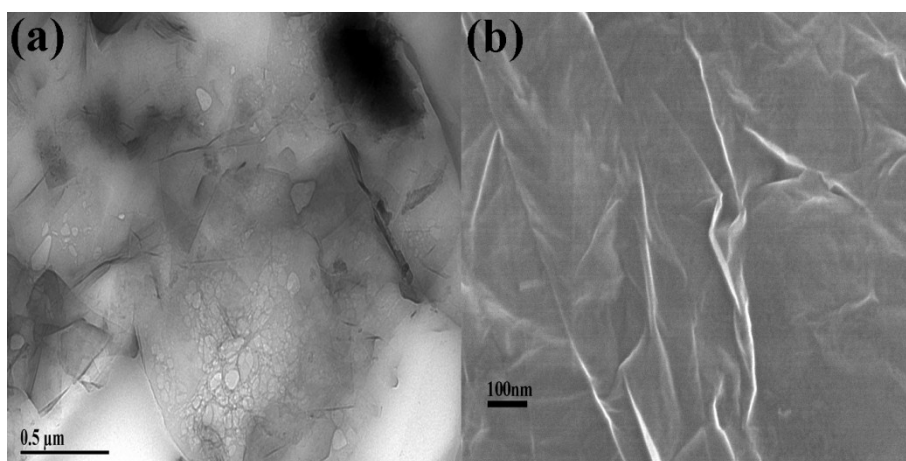

Fig. S2. (a) TEM image of HG100. (b) SEM image of HG100.
